# Supplementary material for: Genomic Analysis of Nasopharyngeal Carcinoma Reveals TME-Based Subtypes
Source: Oxford University Press journal article supplement (doi:10.1158/1541-7786.mcr-17-0134), 2017-08-29
Supplement: 15417786mcr170134-sup-180392_2_supp_4203970_kkdwm4.docx [file 15417786mcr170134-sup-180392_2_supp_4203970_kkdwm4.docx]

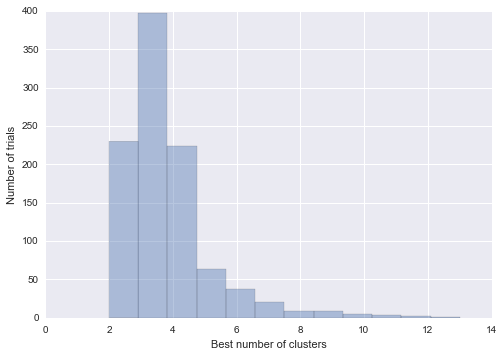


**Figure S1** Distribution of optimal number of clusters (determined using the WB index) identified over 1,000 random samplings of patient mRNA-seq samples. Each data set was generated by randomly selecting 76 of 113 patient samples without replacement.


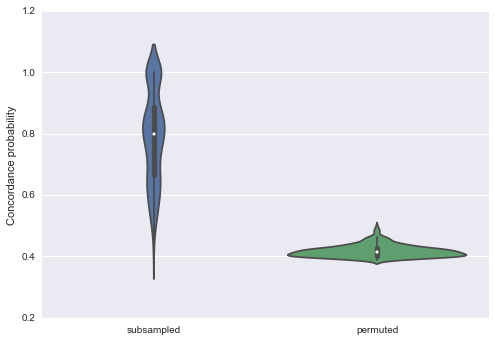


**Figure S2** Clustering concordance probability over 1,000 randomly sampled mRNA-seq data sets clustered into three subtypes. Concordance probability is defined as the probability that two samples assigned to the same subtype in this study will be grouped into the same cluster in a randomly sampled data set of 76 samples. Also shown is the concordance probability estimated by employing the same procedure on data with permuted patient labels.


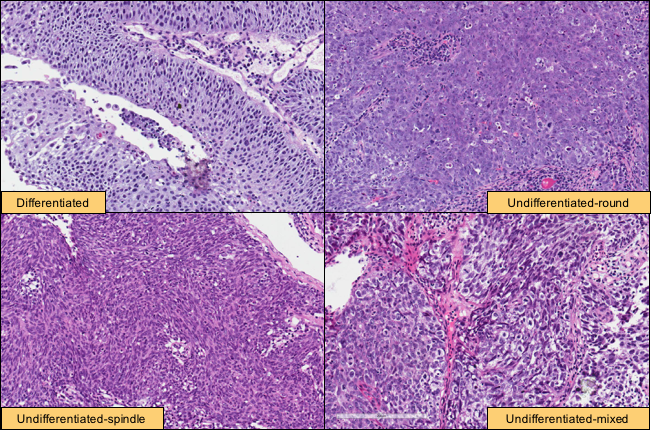


**Figure S3:** Representative histology slides from each of the four morphological subtypes identified in this study.


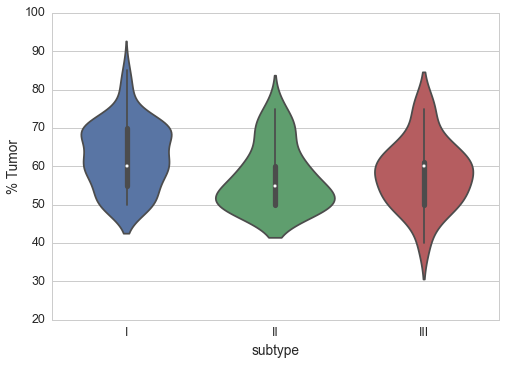


**Figure S4:** Pathologist’s estimate of % tumor content by expression-based subtype. The higher tumor cellularity of subtype I vs. subtype II is significant (p=0.006, MWU test).

**
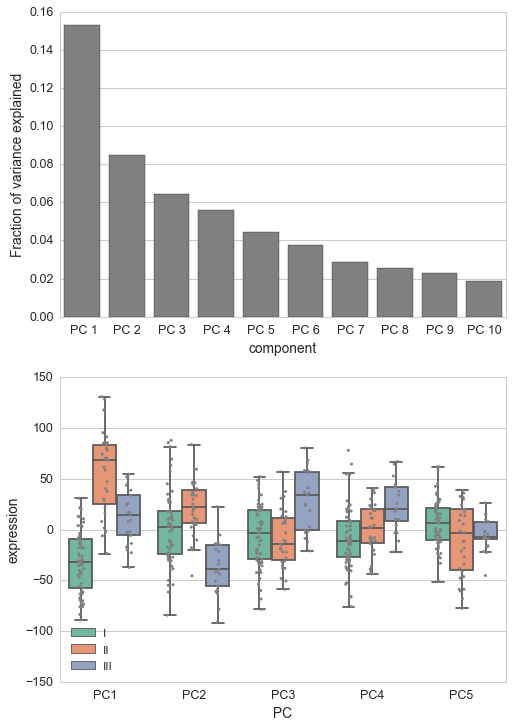
**

**Figure S5:** (upper panel)Fraction of variance explained by the first ten principal components of gene expression for the samples under study. (lower panel) First five principal component scores by subtype. Mean scores were significantly different by subtype for the first four principal components (Bonferroni-corrected p<0.01, ANOVA).


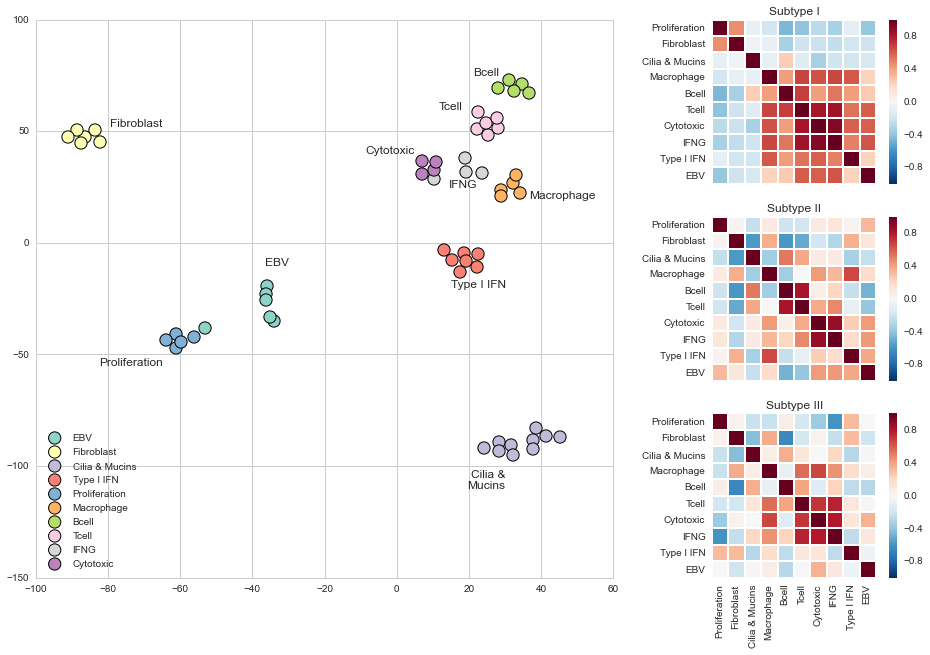


**Figure S6:** A TSNEplot of the genes constituting the pre-specified gene signatures examined in this study is shown in the left panel. Genes within signatures showed high correlation across samples. Correlation heat maps of the signature scores are shown for each subtype in the right panel.


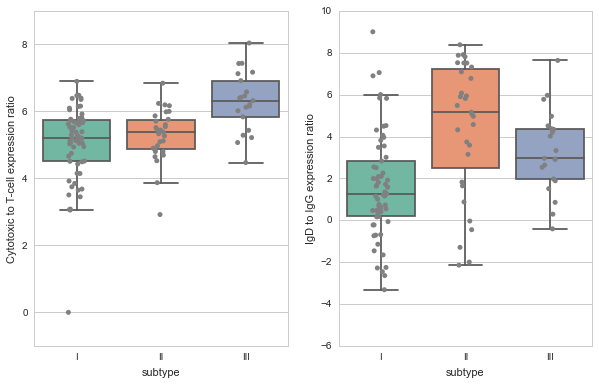


**Figure S7:** Ratio of cytotoxic to T-cell signature levels and IGHD to IGHG1 expression by subtype. Subtype III had a higher ratio of cytotoxic to T-cell expression than subtypes I and II (p<0.05 Tukey HSD). IgD to IgG heavy chain gene expression was higher in subtype II than subtypes I and III (p<0.05 Tukey HSD).


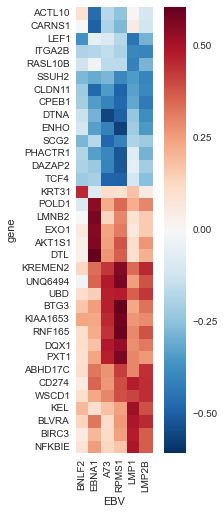


**Figure S8:** Correlation heat map of EBV gene expression and selected human genes in NPC tumor samples.


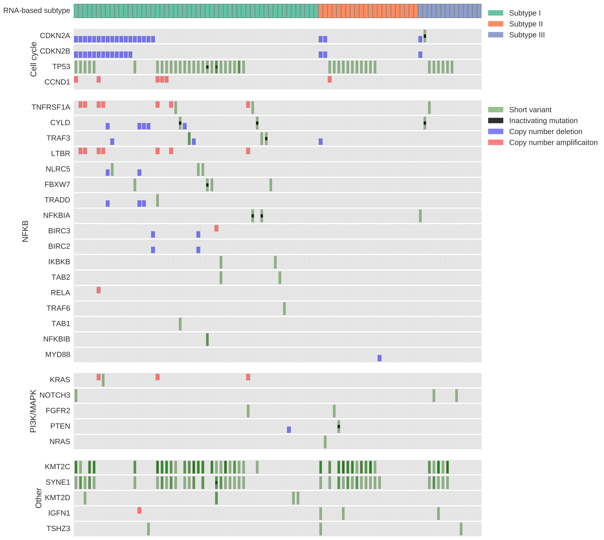


**Figure S9** Mutation and somatic copy number variations for the 94 patients in the ‘paired’ and unpaired cohorts with matched mRNA-seq, exome-seq, and copy number data.


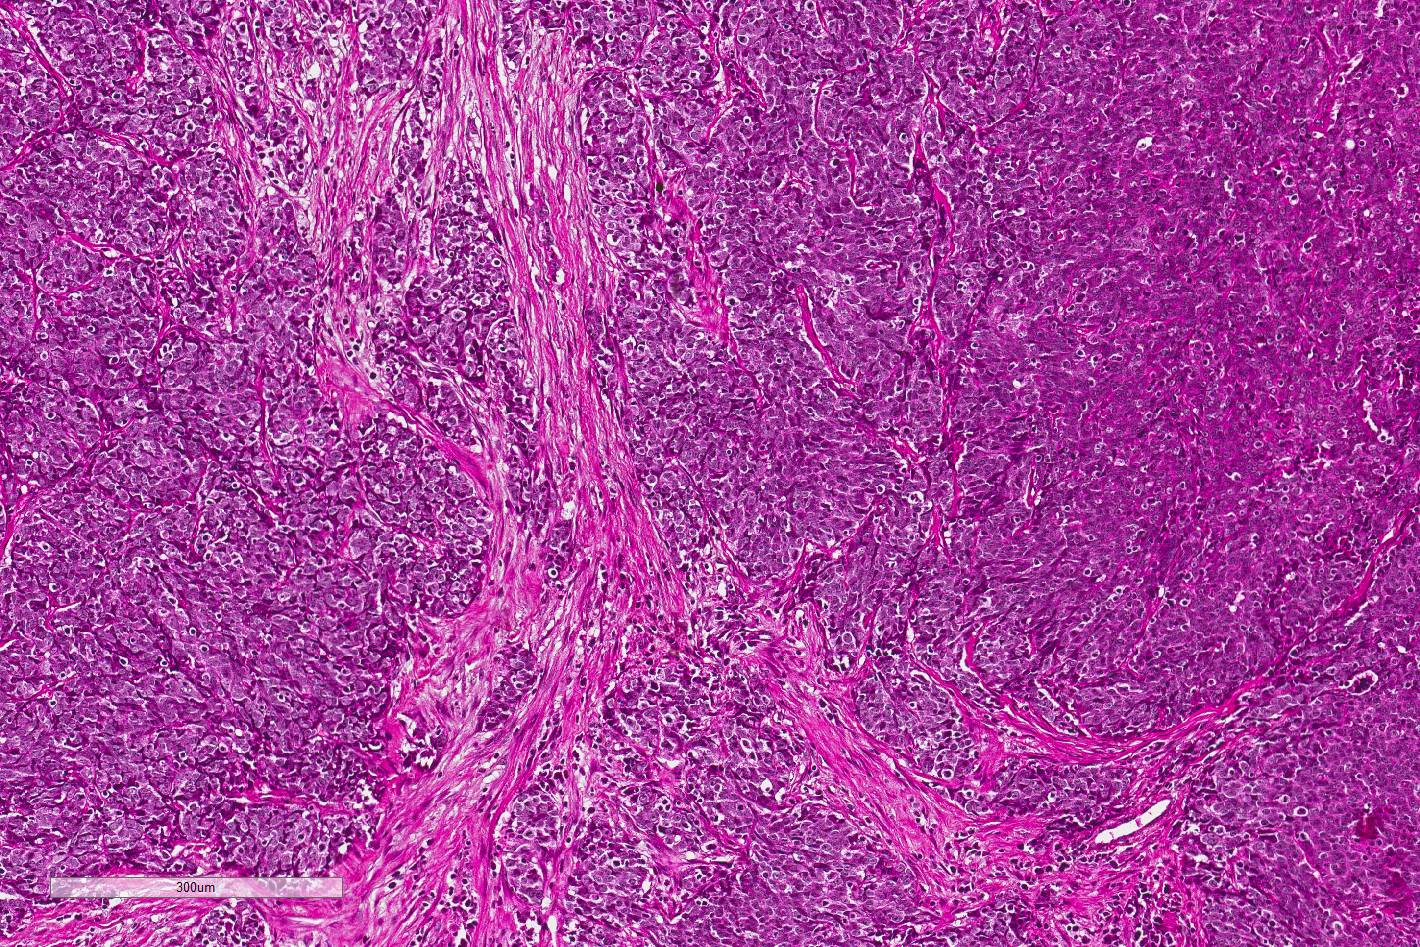


**Figure S10:** Representative image of H&E stained tumor sample showing intra-tumoral TILS (yellow arrows) and intra-tumoral stromal TILs (blue arrows).

**
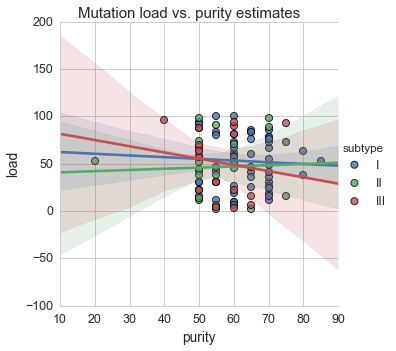
**

**Figure S11**: Total mutation load is not associated with %tumor content in any subtype.
